# Supplementary material for: Brain Inflammation and Intracellular α-Synuclein Aggregates in Macaques after SARS-CoV-2 Infection
Source: MDPI journal article supplement (doi:10.3390/v14040776), 2022-04-08
Supplement: s1 [file s1]

**Histology control animals**

| <b>animal</b> | <b>code</b> | <b>age (yrs)</b> | <b>weight [kg]</b> |
|---------------|-------------|------------------|--------------------|
| R11084        | R5          | 5                | 8.5                |
| R12017        | R6          | 6                | 5.1                |
| J15018        | C5          | 5                | 5.3                |
| J13004        | C6          | 7                | 5.1                |

**PET-CT control animals**

| <b>animal</b> | <b>code</b> | <b>age (yrs)</b> | <b>weight [kg]</b> |
|---------------|-------------|------------------|--------------------|
| R11074        | R7          | 9                | 8.3                |
| R14129        | R8          | 6                | 5.9                |
| R12058        | R9          | 8                | 8.3                |
| R13091        | R10         | 7                | 8.1                |
| R14004        | R11         | 6                | 6.8                |
| R14006        | R12         | 6                | 6.7                |
