# Supplementary figures and images for: Brain Inflammation and Intracellular α-Synuclein Aggregates in Macaques after SARS-CoV-2 Infection
Source: MDPI journal article supplement (doi:10.3390/v14040776), 2022-04-08

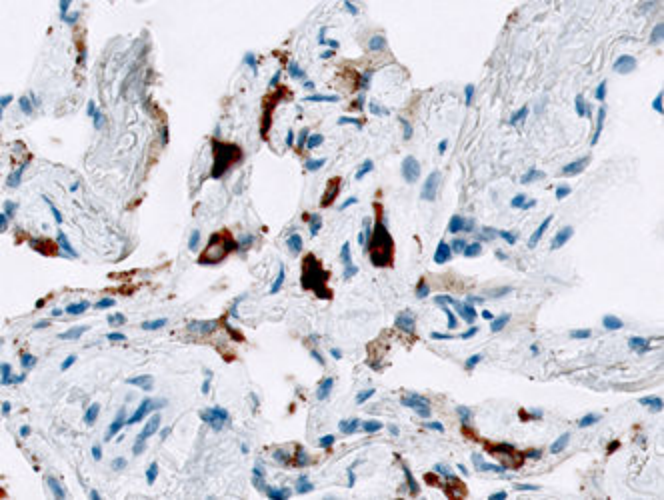

Supplement: s1 [file s1]

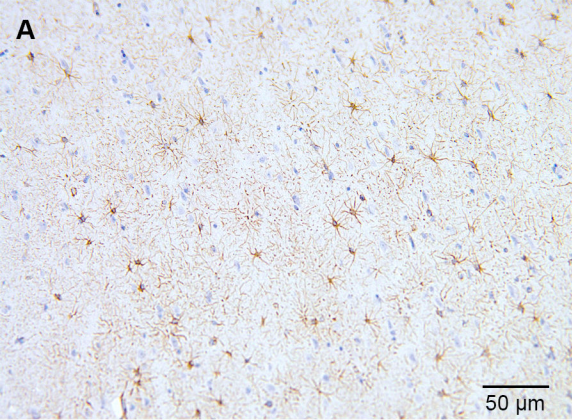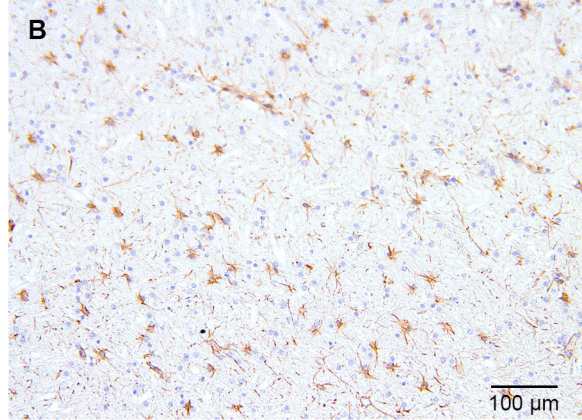

Supplement: s1 [file s1]
